# Supplementary material for: Identity and divergence of protein domain architectures after the yeast whole-genome duplication event
Source: Royal Society of Chemistry journal article supplement (doi:10.1039/c003507f), 2010-08-26
Supplement: c003507f.pdf [file c003507f.pdf]

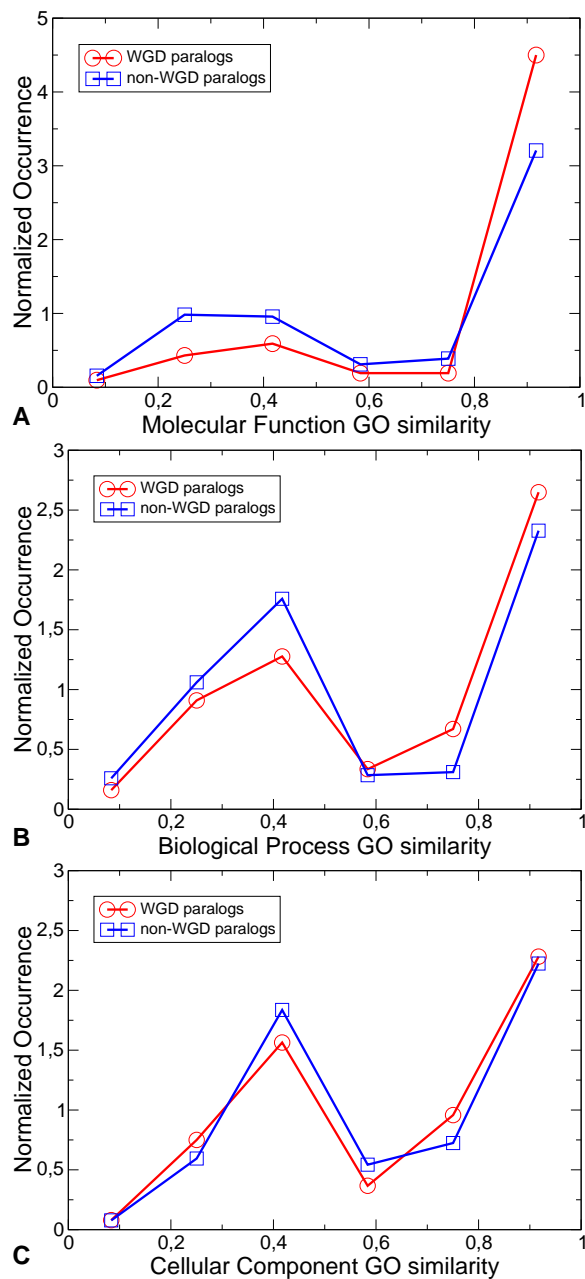

Figure S1: **Functional Similarity of WGD paralogs and non-WGD paralogs.** Normalized histograms of the Gene Ontology similarity between WGD and non-WGD duplicate pairs for the GO branches molecular function (A), biological process (B), cellular component (C). For all the three branches, WGD paralogs tend to have higher GO similarity scores than non-WGD paralogs.

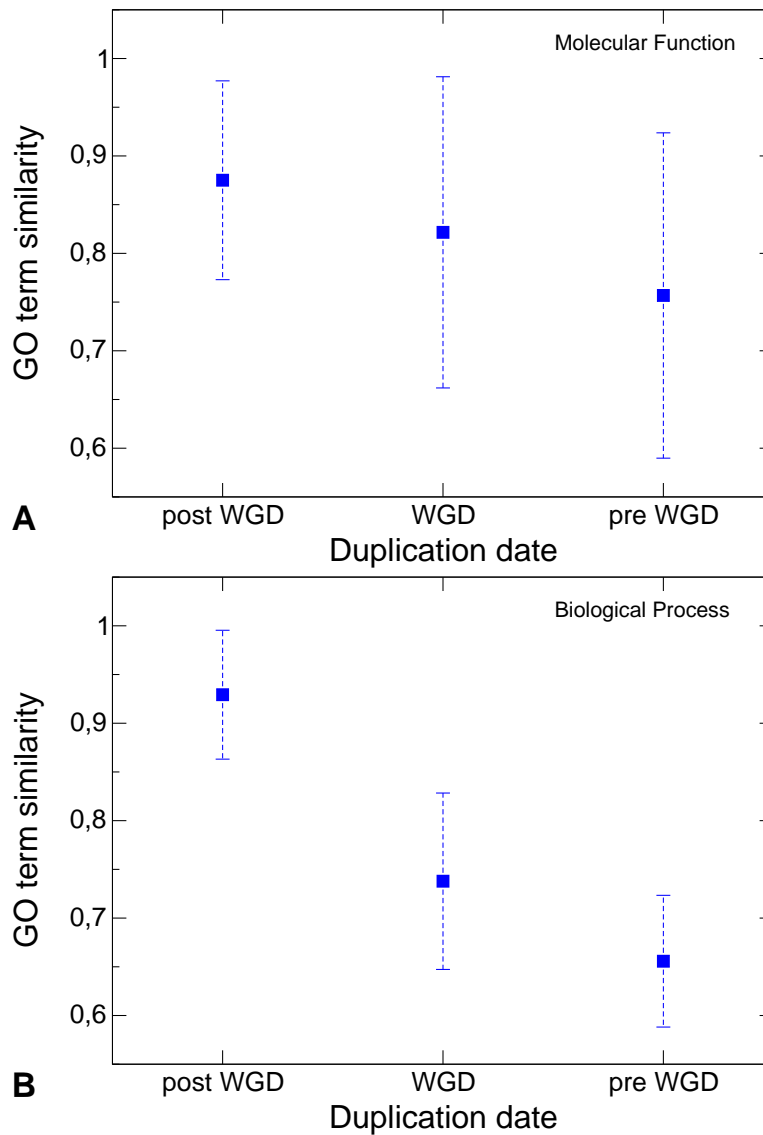

Figure S2: **Functional similarity of duplicates versus duplication age for manually curated GO annotations.** The plots report the mean (squares) and the standard deviation (error bars) of the GOSim similarity score between duplicates of the same age groups. The analysis was restricted only to the genes with experimental manually curated GO terms, grouping pre- and post-WGD duplication to gather sufficient statistics. This comparison is made for the GO branches: Biological Process (A), Molecular Function (B).

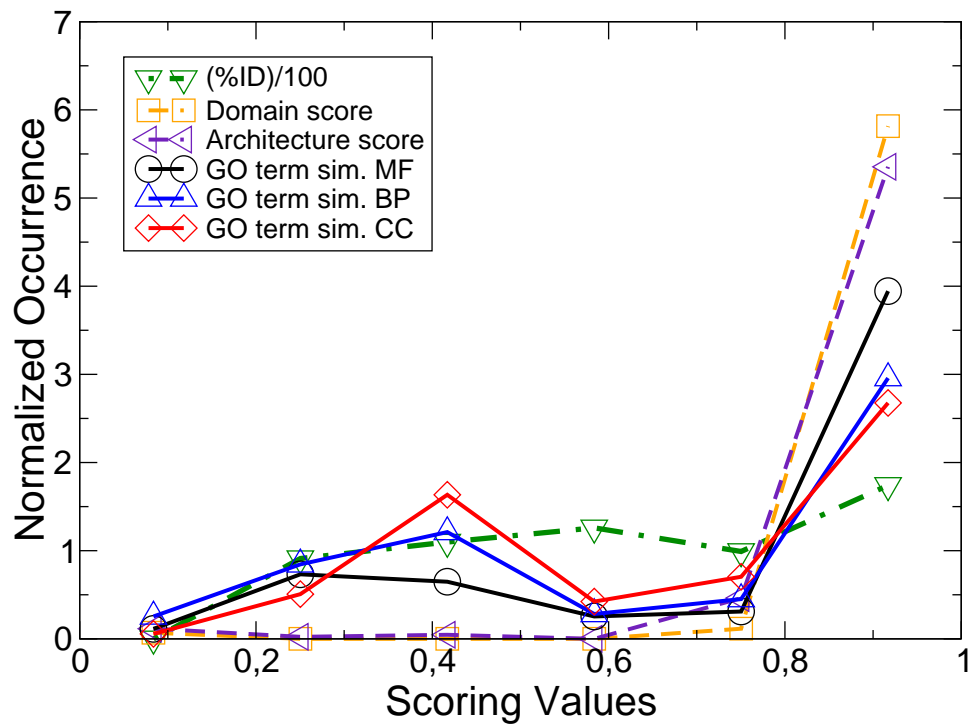

Figure S3: **Structural and functional divergence of paralogs with no gaps in the domain architecture..** The plot reports histograms of sequence ID% retrieved from alignment, domain score, architecture score and GO term similarity (for all three branches) for all the paralog pairs with both proteins with by domain. Despite of this restriction we retrieve the same results shown in Figure 4 of the main text.

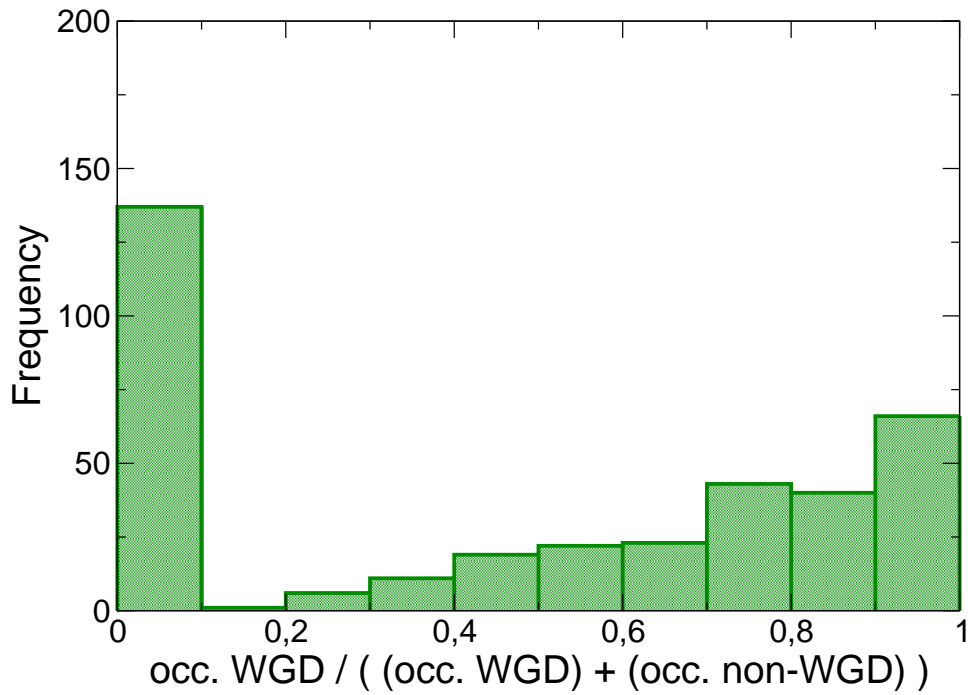

Figure S4: **Occurrence of domain topologies in WGD vs non-WGD duplicates.** For each SCOP domain, we calculated its occurrence in WGD proteins and non-WGD duplicates (normalized by the sizes of these two duplicate sets). The plot reports the histogram of the relative weight of occurrence of WGD duplicates, indicating the separation of two populations of domain topologies: domain topologies that appear in local duplications only (peak at zero), and those that appear in both the WGD and local duplications, having a preference towards the WGD (peak at one).

## Gene Ontology analysis

As a control of the domain-based functional analysis of domain topologies involved in local duplications versus the WGD, we performed a more standard functional characterization based on Gene Ontology analysis on the proteins, along the lines of previous studies [23, 24, 38]. We considered the disjoint sets of WGD and non-WGD paralogs. For each set we extracted the over-represented GO terms, and we compared them looking for the terms shared between WGD and non-WGD-paralogs or specifically connected to a group (over-represented in a group and not significantly present in the other). WGD and non-WGD paralogs are enriched in different GO terms. We performed the same analysis also on randomized sets. Two randomly assorted sets tend to share more over-represented GO terms than WGD paralogs and non-WGD paralogs. These results are inverted considering the terms specific for each group: differently from the random assorted groups, WGD paralogs and non-WGD paralogs have many exclusive genes (see Tables S1 and S2), indicating that WGD and non-WGD paralogs carry out different functions.

In accordance with the domain-based analysis and with the previous hierarchical analysis derived from expression profiles and functional annotations [24], we find that WGD paralogs are enriched for genes involved in ribosomes and translation, regulation of cell cycle, regulation of developmental processes, sporulation, NADP metabolic process. On the other side the non-WGD paralogs are enriched for genes involved in transport, amino acid transmembrane transport, cellular wall, vitamin metabolism.

Finally, a recent study by Guan and coworkers [19] found that WGD duplicates are more likely to share interaction partners and biological functions than non-WGD duplicates. To confirm the latter result, we analyzed the distribution of the GO similarity normalized histograms for all the pairs of the two disjoint sets. Indeed, WGD paralogs result slightly more similar than non-WGD paralogs for all the three GO branches (supplementary figure S1). On the other hand, comparing with figure 4, one notices that pre-WGD paralogs are less similar at the functional level, so that this signal might come at least in part from the functional difference of ancient non-WGD paralogs.

| Gene Ontology terms exclusive of WGD-Paralogs |                 |          |                                                                 |
|-----------------------------------------------|-----------------|----------|-----------------------------------------------------------------|
| GO term                                       | Number of genes | P-value  | annotation                                                      |
| GO:0005737                                    | 571             | 3.62e-22 | cytoplasm                                                       |
| GO:0009987                                    | 647             | 1.72e-21 | cellular process                                                |
| GO:0005622                                    | 675             | 8.80e-19 | intracellular                                                   |
| GO:0044424                                    | 668             | 1.10e-17 | intracellular part                                              |
| GO:0005830                                    | 56              | 1.60e-17 | cytosolic ribosome (sensu Eukaryota)                            |
| GO:0005840                                    | 97              | 6.97e-16 | ribosome                                                        |
| GO:0005575                                    | 740             | 5.40e-15 | cellular component                                              |
| GO:0005829                                    | 92              | 5.57e-15 | cytosol                                                         |
| GO:0044445                                    | 58              | 1.12e-14 | cytosolic part                                                  |
| GO:0044464                                    | 737             | 2.86e-14 | cell part                                                       |
| GO:0005623                                    | 737             | 3.11e-14 | cell                                                            |
| GO:0016773                                    | 62              | 4.53e-14 | phosphotransferase activity, alcohol group as acceptor          |
| GO:0004674                                    | 49              | 5.75e-14 | protein serine/threonine kinase activity                        |
| GO:0009059                                    | 138             | 6.01e-14 | macromolecule biosynthetic process                              |
| GO:0004672                                    | 49              | 2.19e-13 | protein kinase activity                                         |
| GO:0016301                                    | 66              | 4.33e-13 | kinase activity                                                 |
| GO:0003735                                    | 68              | 7.94e-13 | structural constituent of ribosome                              |
| GO:0009058                                    | 203             | 1.13e-12 | biosynthetic process                                            |
| GO:0044262                                    | 69              | 1.45e-12 | cellular carbohydrate metabolic process                         |
| GO:0004713                                    | 42              | 3.62e-12 | protein-tyrosine kinase activity                                |
| GO:0065007                                    | 228             | 4.49e-12 | biological regulation                                           |
| GO:0005488                                    | 536             | 6.77e-12 | binding                                                         |
| GO:0043284                                    | 31              | 7.92e-12 | biopolymer biosynthetic process                                 |
| GO:0000271                                    | 25              | 7.93e-12 | polysaccharide biosynthetic process                             |
| GO:0006468                                    | 47              | 9.56e-12 | protein amino acid phosphorylation                              |
| GO:0044444                                    | 383             | 3.28e-11 | cytoplasmic part                                                |
| GO:0007154                                    | 85              | 5.55e-11 | cell communication                                              |
| GO:0007165                                    | 80              | 9.09e-11 | signal transduction                                             |
| GO:0005843                                    | 26              | 1.60e-10 | cytosolic small ribosomal subunit (sensu Eukaryota)             |
| GO:0006412                                    | 94              | 3.37e-10 | translation                                                     |
| GO:0032502                                    | 106             | 3.71e-10 | developmental process                                           |
| GO:0016051                                    | 33              | 5.93e-10 | carbohydrate biosynthetic process                               |
| GO:0033279                                    | 56              | 1.01e-09 | ribosomal subunit                                               |
| GO:0008152                                    | 520             | 1.6e-09  | metabolic process                                               |
| GO:0050789                                    | 187             | 1.74e-09 | regulation of biological process                                |
| GO:0046164                                    | 27              | 2.35e-09 | alcohol catabolic process                                       |
| GO:0006112                                    | 20              | 2.38e-09 | energy reserve metabolic process                                |
| GO:0044249                                    | 152             | 3.72e-09 | cellular biosynthetic process                                   |
| GO:0044260                                    | 244             | 3.99e-09 | cellular macromolecule metabolic process                        |
| GO:0016052                                    | 30              | 5.11e-09 | carbohydrate catabolic process                                  |
| GO:0044275                                    | 30              | 5.11e-09 | cellular carbohydrate catabolic process                         |
| GO:0050794                                    | 181             | 6.51e-09 | regulation of cellular process                                  |
| GO:0016310                                    | 56              | 9.85e-09 | phosphorylation                                                 |
| GO:0005842                                    | 27              | 1.09e-08 | cytosolic large ribosomal subunit (sensu Eukaryota)             |
| GO:0044237                                    | 485             | 1.35e-08 | cellular metabolic process                                      |
| GO:0006739                                    | 13              | 1.38e-08 | NADP metabolic process                                          |
| GO:0019320                                    | 24              | 1.41e-08 | hexose catabolic process                                        |
| GO:0044264                                    | 27              | 1.55e-08 | cellular polysaccharide metabolic process                       |
| GO:0005976                                    | 27              | 1.55e-08 | polysaccharide metabolic process                                |
| GO:0044238                                    | 478             | 1.57e-08 | primary metabolic process                                       |
| GO:0005516                                    | 11              | 1.86e-08 | calmodulin binding                                              |
| GO:0032989                                    | 62              | 1.91e-08 | cellular structure morphogenesis                                |
| GO:0000902                                    | 62              | 1.91e-08 | cell morphogenesis                                              |
| GO:0006007                                    | 23              | 2.22e-08 | glucose catabolic process                                       |
| GO:0009250                                    | 16              | 2.50e-08 | glucan biosynthetic process                                     |
| GO:0006006                                    | 30              | 2.56e-08 | glucose metabolic process                                       |
| GO:0009653                                    | 62              | 2.63e-08 | anatomical structure morphogenesis                              |
| GO:0005198                                    | 81              | 2.95e-08 | structural molecule activity                                    |
| GO:0005978                                    | 12              | 2.98e-08 | glycogen biosynthetic process                                   |
| GO:0006796                                    | 65              | 3.81e-08 | phosphate metabolic process                                     |
| GO:0006793                                    | 65              | 3.81e-08 | phosphorus metabolic process                                    |
| GO:0006066                                    | 52              | 6.20e-08 | alcohol metabolic process                                       |
| GO:0048856                                    | 62              | 7.67e-08 | anatomical structure development                                |
| GO:0007242                                    | 53              | 7.81e-08 | intracellular signaling cascade                                 |
| GO:0046365                                    | 24              | 9.47e-08 | monosaccharide catabolic process                                |
| GO:0019318                                    | 34              | 9.49e-08 | hexose metabolic process                                        |
| GO:0030529                                    | 107             | 1.25e-07 | ribonucleoprotein complex                                       |
| GO:0006073                                    | 20              | 1.31e-07 | glucan metabolic process                                        |
| GO:0007265                                    | 23              | 1.54e-07 | Ras protein signal transduction                                 |
| GO:0005977                                    | 16              | 1.56e-07 | glycogen metabolic process                                      |
| GO:0065008                                    | 74              | 1.59e-07 | regulation of biological quality                                |
| GO:0006740                                    | 11              | 1.78e-07 | NADPH regeneration                                              |
| GO:0006897                                    | 28              | 2.25e-07 | endocytosis                                                     |
| GO:0010324                                    | 30              | 2.48e-07 | membrane invagination                                           |
| GO:0019843                                    | 17              | 3.02e-07 | rRNA binding                                                    |
| GO:0050793                                    | 11              | 4.48e-07 | regulation of developmental process                             |
| GO:0016772                                    | 77              | 5.36e-07 | transferase activity, transferring phosphorus-containing groups |
| GO:0005933                                    | 40              | 6.06e-07 | cellular bud                                                    |
| GO:0005996                                    | 34              | 6.13e-07 | monosaccharide metabolic process                                |
| GO:0030955                                    | 9               | 7.98e-07 | potassium ion binding                                           |
| GO:0051726                                    | 44              | 9.88e-07 | regulation of cell cycle                                        |

|            |     |          |                                                                                  |
|------------|-----|----------|----------------------------------------------------------------------------------|
| GO:0000074 | 44  | 9.88e-07 | regulation of progression through cell cycle                                     |
| GO:0006098 | 10  | 1.03e-06 | pentose-phosphate shunt                                                          |
| GO:0009117 | 41  | 1.15e-06 | nucleotide metabolic process                                                     |
| GO:0007264 | 34  | 1.76e-06 | small GTPase mediated signal transduction                                        |
| GO:0005979 | 6   | 2.99e-06 | regulation of glycogen biosynthetic process                                      |
| GO:0051278 | 12  | 3.25e-06 | chitin- and beta-glucan-containing cell wall polysaccharide biosynthetic process |
| GO:0008360 | 8   | 5.04e-06 | regulation of cell shape                                                         |
| GO:0006038 | 8   | 5.04e-06 | cell wall chitin biosynthetic process                                            |
| GO:0022603 | 8   | 5.04e-06 | regulation of anatomical structure morphogenesis                                 |
| GO:0022604 | 8   | 5.04e-06 | regulation of cell morphogenesis                                                 |
| GO:0006769 | 17  | 5.74e-06 | nicotinamide metabolic process                                                   |
| GO:0044267 | 220 | 7.05e-06 | cellular protein metabolic process                                               |
| GO:0015935 | 26  | 7.80e-06 | small ribosomal subunit                                                          |
| GO:0005935 | 31  | 8.82e-06 | cellular bud neck                                                                |
| GO:0019362 | 17  | 1.16e-05 | pyridine nucleotide metabolic process                                            |
| GO:0006031 | 9   | 1.29e-05 | chitin biosynthetic process                                                      |
| GO:0006037 | 8   | 1.35e-05 | cell wall chitin metabolic process                                               |
| GO:0000028 | 8   | 1.35e-05 | ribosomal small subunit assembly and maintenance                                 |
| GO:0048610 | 36  | 1.53e-05 | reproductive cellular process                                                    |
| GO:0022413 | 36  | 1.53e-05 | reproductive process in single-celled organism                                   |
| GO:0030427 | 37  | 1.59e-05 | site of polarized growth                                                         |
| GO:0016192 | 70  | 1.61e-05 | vesicle-mediated transport                                                       |
| GO:0005934 | 18  | 1.83e-05 | cellular bud tip                                                                 |
| GO:0005498 | 6   | 1.88e-05 | sterol carrier activity                                                          |
| GO:0005496 | 6   | 1.88e-05 | steroid binding                                                                  |
| GO:0032934 | 6   | 1.88e-05 | sterol binding                                                                   |
| GO:0006887 | 17  | 2.22e-05 | exocytosis                                                                       |
| GO:0015934 | 30  | 2.95e-05 | large ribosomal subunit                                                          |
| GO:0008361 | 33  | 3.01e-05 | regulation of cell size                                                          |
| GO:0015980 | 36  | 3.91e-05 | energy derivation by oxidation of organic compounds                              |
| GO:0009272 | 13  | 3.91e-05 | chitin- and beta-glucan-containing cell wall biogenesis                          |
| GO:0040007 | 34  | 4.31e-05 | growth                                                                           |
| GO:0065009 | 21  | 4.50e-05 | regulation of a molecular function                                               |
| GO:0042546 | 13  | 5.74e-05 | cell wall biogenesis                                                             |
| GO:0006665 | 12  | 6.26e-05 | sphingolipid metabolic process                                                   |
| GO:0010383 | 8   | 6.56e-05 | cell wall polysaccharide metabolic process                                       |
| GO:0030011 | 6   | 6.75e-05 | maintenance of cell polarity                                                     |
| GO:0006869 | 14  | 7.15e-05 | lipid transport                                                                  |
| GO:0050790 | 20  | 7.36e-05 | regulation of catalytic activity                                                 |
| GO:0031505 | 15  | 8.24e-05 | chitin- and beta-glucan-containing cell wall organization and biogenesis         |
| GO:0006042 | 9   | 8.97e-05 | glucosamine biosynthetic process                                                 |
| GO:0006045 | 9   | 8.97e-05 | N-acetylglucosamine biosynthetic process                                         |
| GO:0046349 | 9   | 8.97e-05 | amino sugar biosynthetic process                                                 |
| GO:0006893 | 12  | 9.31e-05 | Golgi to plasma membrane transport                                               |

Table S1: **Gene Ontology terms exclusive of WGD paralogs.** The table reports the results of the enrichment analysis for Gene Ontology terms exclusive of non-WGD duplicates, with populations of functional categories (column two) and P-values from hypergeometric testing (column three).

| Gene Ontology terms exclusive of non-WGD paralogs |                 |          |                                                       |
|---------------------------------------------------|-----------------|----------|-------------------------------------------------------|
| GO term                                           | Number of genes | P-value  | annotation                                            |
| GO:0022891                                        | 60              | 4.99e-16 | substrate-specific transmembrane transporter activity |
| GO:0022857                                        | 64              | 6.24e-16 | transmembrane transporter activity                    |
| GO:0022892                                        | 65              | 1.36e-13 | substrate-specific transporter activity               |
| GO:0005215                                        | 71              | 2.38e-13 | transporter activity                                  |
| GO:0005353                                        | 11              | 4.78e-11 | fructose transmembrane transporter activity           |
| GO:0015578                                        | 11              | 4.78e-11 | mannose transmembrane transporter activity            |
| GO:0005355                                        | 11              | 1.44e-10 | glucose transmembrane transporter activity            |
| GO:0015149                                        | 11              | 3.86e-10 | hexose transmembrane transporter activity             |
| GO:0015145                                        | 11              | 3.86e-10 | monosaccharide transmembrane transporter activity     |
| GO:0015291                                        | 25              | 1.17e-09 | secondary active transmembrane transporter activity   |
| GO:0015293                                        | 19              | 1.36e-09 | symporter activity                                    |
| GO:0022804                                        | 35              | 3.71e-09 | active transmembrane transporter activity             |
| GO:0015171                                        | 14              | 1.02e-08 | amino acid transmembrane transporter activity         |
| GO:0015837                                        | 17              | 1.13e-08 | amine transport                                       |
| GO:0051119                                        | 14              | 1.55e-08 | sugar transmembrane transporter activity              |
| GO:0005351                                        | 14              | 1.55e-08 | sugar:hydrogen ion symporter activity                 |
| GO:0005342                                        | 19              | 1.83e-08 | organic acid transmembrane transporter activity       |
| GO:0046943                                        | 18              | 3.04e-08 | carboxylic acid transmembrane transporter activity    |
| GO:0015144                                        | 14              | 3.42e-08 | carbohydrate transmembrane transporter activity       |
| GO:0006865                                        | 15              | 4.90e-08 | amino acid transport                                  |
| GO:0046942                                        | 19              | 5e-08    | carboxylic acid transport                             |
| GO:0015849                                        | 19              | 6.35e-08 | organic acid transport                                |
| GO:0000023                                        | 8               | 7.87e-08 | maltose metabolic process                             |
| GO:0008615                                        | 8               | 7.87e-08 | pyridoxine biosynthetic process                       |

|            |     |           |                                                       |
|------------|-----|-----------|-------------------------------------------------------|
| GO:0042819 | 8   | 7.87e-08  | vitamin B6 biosynthetic process                       |
| GO:0008614 | 8   | 1.93e-07  | pyridoxine metabolic process                          |
| GO:0042816 | 8   | 1.94e-07  | vitamin B6 metabolic process                          |
| GO:0009277 | 19  | 1.42e-06  | chitin- and beta-glucan-containing cell wall          |
| GO:0048503 | 13  | 3.21e-06  | GPI anchor binding                                    |
| GO:0015205 | 6   | 9.08e-06  | nucleobase transmembrane transporter activity         |
| GO:0015174 | 6   | 9.08e-06  | basic amino acid transmembrane transporter activity   |
| GO:0042402 | 6   | 9.084e-06 | biogenic amine catabolic process                      |
| GO:0016020 | 168 | 1.22e-05  | membrane                                              |
| GO:0005984 | 8   | 1.29e-05  | disaccharide metabolic process                        |
| GO:0015075 | 29  | 1.82e-05  | ion transmembrane transporter activity                |
| GO:0042219 | 6   | 3.59e-05  | amino acid derivative catabolic process               |
| GO:0015175 | 5   | 4.20e-05  | neutral amino acid transmembrane transporter activity |
| GO:0030976 | 5   | 4.20e-05  | thiamin pyrophosphate binding                         |
| GO:0019660 | 5   | 4.20e-05  | glycolytic fermentation                               |
| GO:0006559 | 4   | 6.82e-05  | L-phenylalanine catabolic process                     |
| GO:0031224 | 124 | 7.03e-05  | intrinsic to membrane                                 |
| GO:0030287 | 5   | 8.98e-05  | cell wall-bounded periplasmic space                   |
| GO:0009083 | 5   | 8.98e-05  | branched chain family amino acid catabolic process    |
| GO:0044270 | 9   | 9.37e-05  | nitrogen compound catabolic process                   |
| GO:0009310 | 9   | 9.37e-05  | amine catabolic process                               |
| GO:0016021 | 123 | 9.81e-05  | integral to membrane                                  |

Table S2: **Gene Ontology terms exclusively found in non-WGD paralogs.** The table reports the results of the enrichment analysis for Gene Ontology terms exclusive of non-WGD duplicates, with populations of functional categories (column two) and P-values from hypergeometric testing (column three).



| SCOP superfamily domain occurrence |                            |                                |
|------------------------------------|----------------------------|--------------------------------|
| Domain                             | Occurrence in WGD proteins | Occurrence in non-WGD proteins |
| 46561                              | 2                          | 0                              |
| 46565                              | 0                          | 16                             |
| 46579                              | 0                          | 7                              |
| 46589                              | 0                          | 2                              |
| 46626                              | 2                          | 0                              |
| 46689                              | 8                          | 14                             |
| 46774                              | 0                          | 2                              |
| 46785                              | 8                          | 13                             |
| 46906                              | 2                          | 0                              |
| 46934                              | 2                          | 3                              |
| 46938                              | 2                          | 2                              |
| 46946                              | 2                          | 1                              |
| 46955                              | 0                          | 2                              |
| 46977                              | 2                          | 0                              |
| 47060                              | 0                          | 2                              |
| 47072                              | 0                          | 2                              |
| 47095                              | 4                          | 3                              |
| 47113                              | 2                          | 22                             |
| 47212                              | 2                          | 0                              |
| 47240                              | 2                          | 1                              |
| 47323                              | 2                          | 2                              |
| 47370                              | 4                          | 2                              |
| 47459                              | 0                          | 8                              |
| 47473                              | 2                          | 10                             |
| 47576                              | 0                          | 2                              |
| 47592                              | 4                          | 0                              |
| 47616                              | 0                          | 5                              |
| 47661                              | 2                          | 3                              |
| 47672                              | 1                          | 0                              |
| 47694                              | 0                          | 2                              |
| 47769                              | 2                          | 2                              |
| 47807                              | 2                          | 1                              |
| 47819                              | 0                          | 2                              |
| 47923                              | 4                          | 5                              |
| 47954                              | 10                         | 10                             |
| 47973                              | 0                          | 2                              |
| 48019                              | 0                          | 4                              |
| 48065                              | 2                          | 2                              |
| 48097                              | 0                          | 2                              |
| 48140                              | 2                          | 0                              |
| 48150                              | 2                          | 1                              |
| 48168                              | 2                          | 0                              |
| 48179                              | 2                          | 5                              |
| 48208                              | 2                          | 6                              |
| 48225                              | 0                          | 2                              |
| 48239                              | 0                          | 4                              |
| 48256                              | 2                          | 1                              |
| 48264                              | 0                          | 3                              |
| 48317                              | 2                          | 4                              |
| 48334                              | 0                          | 2                              |
| 48350                              | 6                          | 4                              |
| 48366                              | 2                          | 1                              |
| 48371                              | 8                          | 57                             |
| 48403                              | 6                          | 6                              |
| 48425                              | 2                          | 2                              |
| 48431                              | 1                          | 0                              |
| 48439                              | 0                          | 6                              |
| 48445                              | 2                          | 0                              |
| 48452                              | 6                          | 24                             |
| 48464                              | 6                          | 6                              |
| 48557                              | 0                          | 3                              |
| 48576                              | 0                          | 3                              |
| 48592                              | 0                          | 6                              |
| 48613                              | 0                          | 5                              |
| 48695                              | 2                          | 0                              |
| 49348                              | 2                          | 0                              |
| 49354                              | 2                          | 0                              |
| 49447                              | 0                          | 2                              |
| 49493                              | 0                          | 2                              |
| 49562                              | 2                          | 2                              |
| 49764                              | 0                          | 3                              |
| 49777                              | 0                          | 3                              |
| 49785                              | 0                          | 3                              |
| 49863                              | 1                          | 0                              |
| 49879                              | 6                          | 4                              |
| 49899                              | 4                          | 4                              |
| 50044                              | 9                          | 11                             |
| 50104                              | 6                          | 1                              |
| 50129                              | 0                          | 4                              |
| 50182                              | 0                          | 16                             |
| 50193                              | 2                          | 1                              |

|       |    |     |
|-------|----|-----|
| 50249 | 10 | 16  |
| 50324 | 0  | 2   |
| 50447 | 5  | 4   |
| 50465 | 3  | 2   |
| 50475 | 2  | 2   |
| 50630 | 2  | 10  |
| 50677 | 0  | 2   |
| 50729 | 12 | 8   |
| 50800 | 2  | 0   |
| 50891 | 4  | 3   |
| 50965 | 4  | 1   |
| 50978 | 9  | 83  |
| 50985 | 0  | 3   |
| 51011 | 0  | 7   |
| 51161 | 0  | 2   |
| 51182 | 0  | 3   |
| 51206 | 0  | 2   |
| 51230 | 4  | 2   |
| 51246 | 4  | 0   |
| 51306 | 0  | 3   |
| 51316 | 0  | 3   |
| 51366 | 2  | 5   |
| 51395 | 0  | 7   |
| 51412 | 2  | 4   |
| 51419 | 0  | 2   |
| 51430 | 2  | 14  |
| 51445 | 4  | 18  |
| 51556 | 1  | 5   |
| 51569 | 6  | 4   |
| 51604 | 2  | 3   |
| 51621 | 2  | 3   |
| 51645 | 0  | 2   |
| 51726 | 0  | 2   |
| 51730 | 0  | 3   |
| 51735 | 12 | 61  |
| 51905 | 10 | 10  |
| 51998 | 2  | 0   |
| 52016 | 0  | 4   |
| 52025 | 2  | 1   |
| 52047 | 2  | 6   |
| 52058 | 4  | 3   |
| 52080 | 2  | 2   |
| 52087 | 2  | 2   |
| 52096 | 4  | 0   |
| 52113 | 0  | 3   |
| 52151 | 4  | 3   |
| 52161 | 2  | 1   |
| 52166 | 2  | 1   |
| 52172 | 1  | 0   |
| 52218 | 2  | 2   |
| 52283 | 2  | 3   |
| 52313 | 2  | 1   |
| 52317 | 4  | 8   |
| 52335 | 2  | 0   |
| 52343 | 4  | 3   |
| 52374 | 4  | 11  |
| 52402 | 1  | 6   |
| 52440 | 4  | 0   |
| 52467 | 2  | 7   |
| 52490 | 2  | 2   |
| 52507 | 2  | 2   |
| 52518 | 2  | 6   |
| 52540 | 32 | 121 |
| 52743 | 2  | 0   |
| 52768 | 0  | 6   |
| 52777 | 0  | 4   |
| 52799 | 2  | 10  |
| 52821 | 2  | 6   |
| 52833 | 16 | 24  |
| 52922 | 2  | 0   |
| 52935 | 2  | 0   |
| 52949 | 0  | 2   |
| 52954 | 2  | 0   |
| 52972 | 0  | 2   |
| 53032 | 0  | 2   |
| 53067 | 12 | 23  |
| 53092 | 0  | 2   |
| 53098 | 2  | 54  |
| 53137 | 2  | 2   |
| 53167 | 0  | 2   |
| 53187 | 2  | 7   |
| 53223 | 0  | 4   |
| 53244 | 2  | 1   |
| 53254 | 4  | 13  |

|       |    |    |
|-------|----|----|
| 53271 | 6  | 6  |
| 53328 | 0  | 2  |
| 53335 | 0  | 45 |
| 53383 | 4  | 30 |
| 53448 | 12 | 12 |
| 53474 | 9  | 31 |
| 53613 | 0  | 9  |
| 53623 | 2  | 1  |
| 53633 | 2  | 0  |
| 53649 | 2  | 4  |
| 53659 | 2  | 5  |
| 53686 | 0  | 6  |
| 53697 | 1  | 2  |
| 53720 | 0  | 11 |
| 53732 | 0  | 4  |
| 53738 | 2  | 1  |
| 53756 | 4  | 7  |
| 53774 | 2  | 5  |
| 53850 | 0  | 4  |
| 53901 | 0  | 4  |
| 53927 | 1  | 5  |
| 54001 | 6  | 17 |
| 54189 | 2  | 2  |
| 54197 | 3  | 4  |
| 54211 | 6  | 15 |
| 54236 | 4  | 12 |
| 54427 | 0  | 3  |
| 54495 | 2  | 13 |
| 54534 | 2  | 2  |
| 54570 | 0  | 2  |
| 54575 | 2  | 0  |
| 54616 | 2  | 0  |
| 54626 | 0  | 2  |
| 54631 | 2  | 2  |
| 54637 | 0  | 5  |
| 54686 | 0  | 2  |
| 54695 | 2  | 2  |
| 54747 | 2  | 0  |
| 54768 | 0  | 5  |
| 54791 | 0  | 3  |
| 54826 | 2  | 3  |
| 54843 | 2  | 1  |
| 54849 | 0  | 6  |
| 54897 | 2  | 2  |
| 54928 | 10 | 40 |
| 54980 | 2  | 0  |
| 54999 | 0  | 2  |
| 55021 | 2  | 2  |
| 55035 | 2  | 0  |
| 55060 | 2  | 3  |
| 55103 | 0  | 2  |
| 55120 | 4  | 4  |
| 55129 | 2  | 2  |
| 55154 | 2  | 0  |
| 55174 | 2  | 3  |
| 55190 | 2  | 0  |
| 55205 | 0  | 2  |
| 55257 | 0  | 4  |
| 55277 | 2  | 0  |
| 55282 | 2  | 1  |
| 55298 | 2  | 0  |
| 55307 | 2  | 2  |
| 55315 | 4  | 4  |
| 55424 | 2  | 1  |
| 55455 | 2  | 2  |
| 55469 | 0  | 2  |
| 55486 | 2  | 4  |
| 55608 | 0  | 6  |
| 55666 | 0  | 2  |
| 55681 | 2  | 5  |
| 55729 | 0  | 18 |
| 55753 | 0  | 3  |
| 55797 | 2  | 1  |
| 55811 | 0  | 7  |
| 55821 | 0  | 2  |
| 55856 | 0  | 5  |
| 55874 | 2  | 0  |
| 55920 | 0  | 6  |
| 55957 | 2  | 1  |
| 55973 | 2  | 0  |
| 55979 | 0  | 2  |
| 56019 | 0  | 3  |
| 56047 | 0  | 3  |
| 56053 | 0  | 3  |

|       |    |    |
|-------|----|----|
| 56059 | 4  | 0  |
| 56104 | 0  | 4  |
| 56112 | 55 | 2  |
| 56204 | 0  | 2  |
| 56219 | 4  | 5  |
| 56235 | 4  | 15 |
| 56281 | 3  | 5  |
| 56300 | 6  | 14 |
| 56317 | 0  | 5  |
| 56425 | 4  | 0  |
| 56542 | 2  | 0  |
| 56634 | 0  | 2  |
| 56655 | 0  | 4  |
| 56672 | 0  | 8  |
| 56752 | 2  | 1  |
| 56784 | 10 | 18 |
| 56801 | 2  | 6  |
| 56808 | 2  | 3  |
| 56815 | 0  | 4  |
| 56988 | 0  | 6  |
| 57196 | 1  | 0  |
| 57667 | 19 | 15 |
| 57701 | 12 | 41 |
| 57716 | 4  | 10 |
| 57756 | 2  | 2  |
| 57783 | 0  | 5  |
| 57829 | 8  | 0  |
| 57850 | 4  | 25 |
| 57863 | 2  | 4  |
| 57868 | 0  | 2  |
| 57879 | 2  | 1  |
| 57903 | 2  | 11 |
| 63380 | 2  | 4  |
| 63393 | 0  | 2  |
| 63411 | 0  | 7  |
| 63737 | 2  | 1  |
| 63748 | 0  | 3  |
| 64005 | 0  | 3  |
| 64153 | 0  | 2  |
| 64197 | 2  | 0  |
| 64268 | 1  | 9  |
| 64356 | 0  | 12 |
| 64484 | 0  | 6  |
| 68906 | 2  | 2  |
| 69000 | 0  | 2  |
| 69322 | 1  | 0  |
| 69572 | 2  | 7  |
| 69593 | 2  | 3  |
| 69645 | 0  | 2  |
| 74650 | 0  | 3  |
| 74924 | 0  | 3  |
| 75217 | 2  | 1  |
| 75304 | 0  | 2  |
| 75553 | 0  | 4  |
| 75620 | 0  | 2  |
| 75632 | 1  | 0  |
| 81271 | 0  | 2  |
| 81296 | 6  | 2  |
| 81321 | 2  | 1  |
| 81333 | 0  | 4  |
| 81338 | 0  | 5  |
| 81342 | 0  | 2  |
| 81343 | 2  | 1  |
| 81383 | 0  | 4  |
| 81406 | 2  | 1  |
| 81442 | 0  | 4  |
| 81606 | 2  | 5  |
| 81631 | 2  | 0  |
| 81653 | 2  | 2  |
| 81660 | 2  | 2  |
| 81665 | 0  | 2  |
| 81811 | 2  | 0  |
| 81901 | 2  | 3  |
| 81995 | 2  | 0  |
| 82061 | 1  | 0  |
| 82109 | 2  | 5  |
| 82199 | 2  | 9  |
| 82215 | 2  | 1  |
| 82282 | 2  | 1  |
| 82549 | 0  | 2  |
| 82649 | 2  | 0  |
| 82657 | 0  | 3  |
| 82754 | 2  | 0  |
| 82919 | 2  | 0  |

|        |    |    |
|--------|----|----|
| 88697  | 1  | 2  |
| 88713  | 0  | 2  |
| 88723  | 0  | 6  |
| 88798  | 0  | 2  |
| 89000  | 4  | 0  |
| 89009  | 4  | 1  |
| 89124  | 0  | 3  |
| 89360  | 0  | 2  |
| 89942  | 0  | 2  |
| 90096  | 0  | 2  |
| 90123  | 2  | 0  |
| 90229  | 2  | 0  |
| 100920 | 6  | 1  |
| 100934 | 2  | 3  |
| 100950 | 4  | 6  |
| 101152 | 0  | 2  |
| 101447 | 0  | 3  |
| 101473 | 0  | 2  |
| 101489 | 2  | 0  |
| 101576 | 2  | 1  |
| 102114 | 0  | 2  |
| 102712 | 0  | 2  |
| 102860 | 2  | 0  |
| 103111 | 0  | 2  |
| 103243 | 2  | 0  |
| 103473 | 22 | 68 |
| 103481 | 3  | 3  |
| 103506 | 10 | 24 |
| 109993 | 0  | 2  |
| 110296 | 0  | 6  |
| 110921 | 2  | 0  |
| 110942 | 2  | 0  |
| 111331 | 2  | 1  |
| 111352 | 2  | 1  |
| 111430 | 2  | 1  |

**Table S3: List of the SCOP superfamily domains appearing in duplications and their relative population in the WGD and non-WGD sets of duplicates.**

|              | Domain score | Arch. score | GO sim MF | GO sim BP | GO sim CC |
|--------------|--------------|-------------|-----------|-----------|-----------|
| Domain score |              | 0.97        | 0.16      | 0.07      | 0.1       |
| Arch. score  |              |             | 0.16      | 0.09      | 0.11      |
| GO sim MF    |              |             |           | 0.44      | 0.24      |
| GO sim BP    |              |             |           |           | 0.34      |

Table S4: **Spearman’s rank correlation coefficient of the different scores used to compare paralogs** - Domain score and Architecture score have a strong positive correlation while only weak positive correlation is found between other scores.

## Generation of Domain Architectures

In this section, we describe in more detail the algorithms used for the construction of homology classes. To give a clear and complete description we will employ pseudocode. A brief summary of standard conventions is given here for reference.

- *Hash Tables.* A hash table, or a hash map, is a data structure that associates keys with values. The primary operation it must support efficiently is a lookup: given a key (a given gene, for example), find the corresponding value or values (in this example, its architecture). Hash tables are written with capital boldface letters: for example, **DAG** refers to a hash table called DAG (in the following, the one storing the Domain Architectures for the Genes).
- Variables are not declared. Variables, which may or may not be keys of a hash table, are usually indicated with lowercase boldface letters, as in **g** or **d**.
- The “pertaining to set” ( $\in$ ) symbol has the conventional set-theoretical meaning. The value or values for a given key are always an homogenous set of some kind: these might be numbers, names or, more in general, strings. The pseudocode  $\mathbf{g} \in \mathbf{DAG}$  indicates that the specific gene **g** is a key of the hash table **DAG**.
- If the hash table **H** contains more than a value for a given key (say **k**), then  $\mathbf{H}[\mathbf{k}]$  is defined as the set of all the values for the given key **k**. For example, let **DA** be the hash table consisting of a given number of distinct Domain Architecture as keys, whose values are (for each given architecture) the genes with that distinct architecture; let **g** be a gene, and **d** an architecture. Then  $\mathbf{g} \in \mathbf{DA}[\mathbf{d}]$  means that the gene **g** is a value for the key **d** in the hash table **DA**.
- The “absolute value” symbol ( $|\cdot|$ ) expresses the value of the current key or variable, or the dimension (number of keys) of the hash table. For example,  $|\mathbf{DA}| = N$  means that the hash table **DA** is composed of  $N$  keys; otherwise  $|\mathbf{g}| = d$  means that the gene **g** has architecture  $d$ . In this case  $d$  is considered a value.
- The “equality” symbol ( $=$ ) has two distinct meanings. It might refer to the mathematical equality:  $|\mathbf{H}| = N$  means that  $N$  and the number of keys for hash table **H** are the same number. For non-numerical arguments,  $=$  symbol can imply a broader meaning of similitude; this is specially true when equating names or strings. In this latter case, higher forms of equality may be represented with other symbols, such as “ $\equiv$ ”, “ $\simeq$ ” or other easily recognizable symbols which must be completely defined.
- In the specific case of our work, each architecture is an ordered string of domain assignment codes. Were needed, one may indicate with  $\text{Length}[\mathbf{d}]$  or  $L[\mathbf{d}]$  the number of domains the architecture is composed of. The symbol  $\mathbf{d}[i]$  may then be used to indicate the  $i^{\text{th}}$  domain of architecture **d**.
- Attribution of numerical values is usually represented with “ $\leftarrow$ ” symbol (but never with the  $=$  symbol). The code  $\mathbf{X}[\mathbf{i}] \leftarrow 1$  assigns the value 1 to the  $i^{\text{th}}$  component of object **X**.

```

01:   for each g ∈ DAG                               # considering each gene g
02:     for each d ∈ DA                               # considering all the domain architectures d
03:       HOMOLOGY := TRUE                             # will g have architecture d ?
04:       if Length[d] = Length[g]                 # they have the same length ?
05:       then                                           #
06:         for i = 0 to Length[d]                   # considering all the domains
07:           if g[i] ≠ d[i]                       # are they all equal, in sequence ?
08:             HOMOLOGY := FALSE                       #
09:           end for                                   #
10:       else HOMOLOGY := FALSE                       # they do not have the same length
11:       if HOMOLOGY = TRUE                           #
12:         then g ∈ DA[d]                           # g has domain architecture d
13:       end for
14:   end for

```

Table S5: Pseudocode describing the algorithm for Homology Criterion **A**. The domain architecture of each gene is compared to all the different domain architectures. When the algorithm is complete, the genes results aggregated in sets, depending on their architecture. In other words, each set of keys for an element (domain architecture) of the hash table **DA**, represent an equivalence class of genes.

- Attribution of non-numerical values is represented with “ $\cup$ ” symbol, as in  $|\mathbf{g}| = |\mathbf{g}| \cup \mathbf{d}$ : add the value **d** to the (set of) values of key **g**. Usually the set-theoretical properties of  $\cup$  are implied. This means that this will not be used on objects where order matters (strings).
- Pseudocode was kept as simple as possible, but sometimes the employ of flow control is necessary. “For” cycles will begin with a lowercase bold **for** keyword followed by the control statement. In the most complex cases, another keyword **endfor** will be provided for clarity. The same applies to “while” cycles and “if”, “case” or “switch” statements.

## S1 Homology criteria

### Criterion A.

This criterion implements the simple requirement that two protein architectures must be exactly matching in order to be considered as being coded by paralogs. This so that it generates equivalence classes: each protein appears in only one class, together with all the other homologous proteins. Therefore, the classes form a partition of the set of all proteins.

### Criterion B.

This criterion relaxes the previous one, considering two proteins as homologous if their architectures are equal, or if one can be seen as a multiple repetition of the other, ignoring possible gap mismatches. This criterion is also implemented so to generate equivalence classes.



As before, let  $L[\mathbf{g}]$  be defined as the total number of domains present in gene architecture, and let us suppose to consider a pair of gene architectures,  $\mathbf{a}$  and  $\mathbf{b}$ . We have three cases:

1.  $L[\mathbf{a}] = L[\mathbf{b}]$
2.  $L[\mathbf{a}] > L[\mathbf{b}]$  but  $L[\mathbf{a}] < 2 \times L[\mathbf{b}]$
3.  $L[\mathbf{a}] > 2 \times L[\mathbf{b}]$

In the first case the algorithm follows exactly criterion A: if each pair of corresponding domains is equal between the genes A and B, the two genes show homology.

In the second case, the two genes are considered equivalent only if the whole string of the shorter can be found in the longer, and the excess domains in the longer are gaps.

Lastly, in case number three, the algorithm performs an integer division and computes how many times the shorter architecture may fit in the longer one (quotient). The remainder of this division, if nonzero, is used to offset the beginning domains of the longer string. For each of the possible values of the offsetting value,  $0 \leq \text{offset} \leq \text{remainder}$ , the short architecture is repeated *remainder* times in the longer, starting from the offsetted domain  $\mathbf{g}[i]$ . If match is found AND the offset domains are gaps, the two genes are considered matching. In case still no match is found, the algorithm repeats the procedure, assuming again that the shorter string is repeated in the longer, but also assuming that the repetitions of the shorter string are intervalled by gap domains. This is done considering the shorter domain architecture as it was one (*\_gap\_*) domain longer. Again, if match is found AND the offsetted domains are gaps, the architectures are equivalent.

```

01:   for each  $g \in \mathbf{DAG}$ 
02:     for each  $d \in \mathbf{DA}$ 
03:       if  $L[g] = L[d]$ 
04:         hard criterion on  $|g|$  and  $d$ 
05:         if match then  $\mathbf{HOMOLOGY} := \mathbf{TRUE}$ ; break
06:       if  $L[g] > L[d]$  and if  $L[g] < 2 \times L[d]$ 
07:         for  $i=0$  to  $(L[g]) - L[d]$ 
08:           hard criterion on  $|g[j+i]|$  and  $d[j]$ 
09:           if (match) and (discarded =  $\_gap$ -)
10:             then  $\mathbf{HOMOLOGY} := \mathbf{TRUE}$ ; break
11:         end for
12:       if  $L[g] > 2 \times L[d]$ 
13:          $L[g] = \mathbf{QUOT} \times L[d] + \mathbf{REM}$ 
14:         for each  $i=0$  to  $\mathbf{REM}$ 
15:           for each  $j=0$  to  $\mathbf{QUOT}$ 
16:             hard criterion on  $|g[j \times \mathbf{QUOT} + i]|$  and  $d[j]$ 
17:           end for
18:           if (match) and (discarded =  $\_gap$ -)
19:             then  $\mathbf{HOMOLOGY} := \mathbf{TRUE}$ ; break
20:         end for
21:          $L[g] = \mathbf{QUOT} \times L[d \cup 0] + \mathbf{REM}$ 
22:         for each  $i=0$  to  $\mathbf{REM}$ 
23:           for each  $j=0$  to  $\mathbf{QUOT}$ 
24:             hard criterion on  $|g[j \times \mathbf{QUOT} + i]|$  and  $d[j]$ 
25:           end for
26:           if (match) and (discarded =  $\_gap$ -)
27:             then  $\mathbf{HOMOLOGY} := \mathbf{TRUE}$ 
28:         end for
29:       end for
30:     end for
31:   end for

```

Table S6: Algorithm for Criterion **B**. In this case a multiple repetition of an architecture is allowed. However the duplication must be retrieved completely, without exceptions. It can be noted that the presence of the gaps is allowed in principle, but it happens that gap domains *inside* the sequences are almost absent in most datasets.

```

01:   for each g ∈ DAG
02:     for each d ∈ DA
03:       if  $L[|g|] = L[d]$ 
04:         hard criterion on  $|g|$  and d
05:         if match then HOMOLOGY := TRUE; break
06:       if  $L[|g|] > L[d]$  and if  $L[|g|] < 2 \times L[d]$ 
07:         for i=0 to  $(L[|g|] - L[d])$ 
08:           hard criterion on  $|g[j+i]|$  and d[j]
09:           if (match)
10:             then HOMOLOGY := TRUE; break
11:         end for
12:       if  $L[|g|] > 2 \times L[d]$ 
13:          $L[|g|] = \text{QUOT} \times L[d] + \text{REM}$ 
14:         for each i=0 to REM
15:           for each j=0 to QUOT
16:             hard criterion on  $|g[j \times \text{QUOT} + i]|$  and d[j]
17:           end for
18:           if (match) and (discarded = _gap_)
19:             then HOMOLOGY := TRUE; break
20:         end for
21:          $L[|g|] = \text{QUOT} \times L[d \cup 0] + \text{REM}$ 
22:         for each i=0 to REM
23:           for each j=0 to QUOT
24:             hard criterion on  $|g[j \times \text{QUOT} + i]|$  and d[j]
25:           end for
26:           if (match)
27:             then HOMOLOGY := TRUE
28:         end for
29:       end for
30:     end for
31:   end for

```

Table S7: Algorithm for Criterion C.

### Criterion C.

This last criterion is obtained through further relaxing of the conditions considered in criterion B. Two protein architectures are considered as homologous if they are equal, or if one of them can be seen as an *approximate* repetition of the other. With approximate we mean that the repeated architecture domain sequences can be interspaced by gaps *or* other domains.
